# Supplementary material
Source: Springer Nature journal article supplement (https://www.springermedizin.de/resource/supplementary/12874_2008_317_MOESM4_ESM.pdf/9434236)
Supplement: MOESM4 [file 9434236]

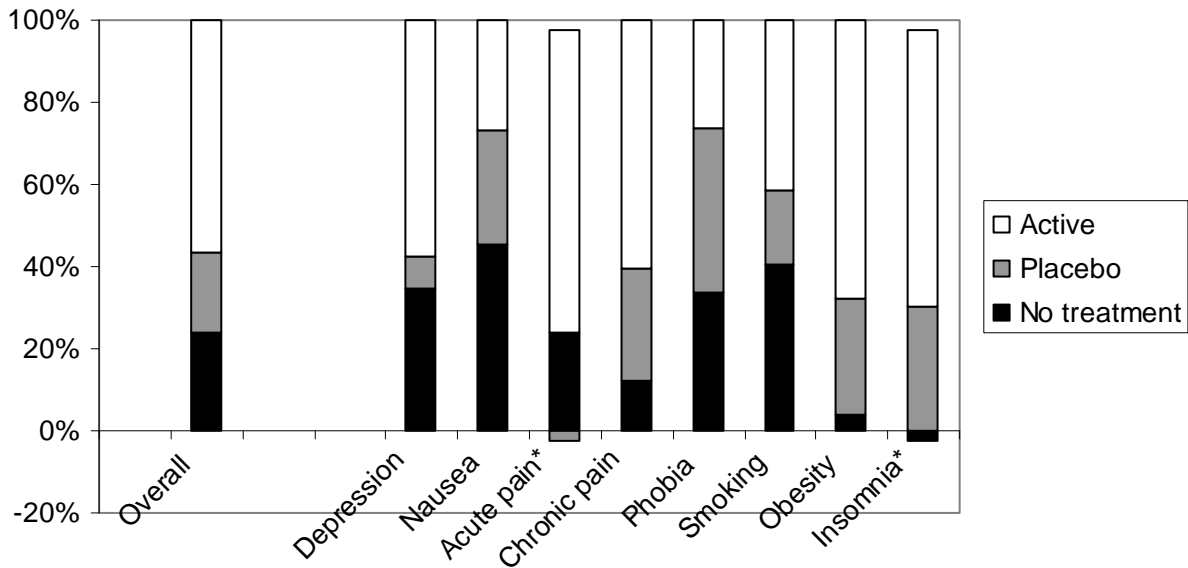

\*for acute pain, the effect of placebo was negative; for insomnia, the "effect" of no treatment was negative
